# Supplementary material for: The effect of different ligand substituents on the chemistry of a zinc–pyrazole anion host
Source: Royal Society of Chemistry journal article supplement (doi:10.1039/b9nj00412b), 2009-11-03
Supplement: b9nj00412b.pdf [file b9nj00412b.pdf]

# The Effect of Different Ligand Substituents on the Chemistry of a Zinc/Pyrazole Anion Host

Jonathan Day, Katie E. R. Marriott, Colin A. Kilner and Malcolm A. Halcrow\*

*School of Chemistry, University of Leeds, Woodhouse Lane, Leeds, UK LS2 9JT.  
E-mail: m.a.halcrow@leeds.ac.uk*

## Electronic Supplementary Information

**Figure S1** View of the asymmetric unit in the crystal structure of  $[\text{ZnCl}_2(\text{Hpz}^{\text{Tn}})_2]$ .

**Table S1** Selected bond lengths and angles in the crystal structure of  $[\text{ZnCl}_2(\text{Hpz}^{\text{Tn}})_2]$ .

**Figure S2** View of the hydrogen-bonded dimer in the crystal structure of  $[\text{ZnCl}_2(\text{Hpz}^{\text{Cy}})_2]$ .

**Table S2** Selected bond lengths and angles in the crystal structure of  $[\text{ZnCl}_2(\text{Hpz}^{\text{Cy}})_2]$ .

**Table S3** Metric parameters for hydrogen bonds in the  $[\text{ZnCl}_2(\text{Hpz}^{\text{R}})_2]$  structures.

**Figure S3** Partial packing diagram of  $[\text{ZnCl}_2(\text{Hpz}^{\text{Cy}})_2]$ , showing the association of the dimers in the crystal through the C–H...Cl interactions.

**Figure S4** Space-filling views of the guest-binding cavities in  $[\text{ZnCl}(\text{Hpz}^{\text{tBu}})_3]\text{Cl}$  and  $[\text{ZnCl}(\text{Hpz}^{\text{Ph}})_3]\text{Cl}$ .

**Figure S5** Space-filling views of the guest-binding cavities in  $[\text{ZnCl}(\text{Hpz}^{\text{tBu}})_3]\text{NO}_3$ , containing one nitrate guest;  $[\text{ZnCl}(\text{Hpz}^{\text{Cy}})_3]\text{NO}_3$ , containing two nitrate ions; and the monomeric unit in  $[\text{ZnBr}(\text{Hpz}^{\text{Cy}})_3]\text{NO}_3 \cdot \text{H}_2\text{O}$ , containing a nitrate ion and water molecule.

**Figure S6** Space-filling and cutaway diagrams of the hydrogen-bonded dimer in  $[\text{ZnCl}(\text{Hpz}^{\text{Cy}})_3]\text{NO}_3$ .

**Figure S7** Partial space-filling and cutaway packing diagrams of  $[\text{ZnBr}(\text{Hpz}^{\text{Cy}})_3]\text{NO}_3 \cdot \text{H}_2\text{O}$ .

**Figure S8** View of the hydrogen-bonded dimer in the crystal structure of  $[\text{ZnCl}(\text{Hpz}^{\text{Cy}})_3]\text{ClO}_4$ .

**Table S4** Selected bond lengths and angles in the crystal structure of  $[\text{ZnCl}(\text{Hpz}^{\text{Cy}})_3]\text{ClO}_4$ .

**Figure S9** Space-filling view of the hydrogen-bonded dimer in the crystal structure of  $[\text{ZnCl}(\text{Hpz}^{\text{Cy}})_3]\text{ClO}_4$ .

**Table S5** Metric parameters for hydrogen bonds in the  $[\text{ZnY}(\text{Hpz}^{\text{R}})_3]\text{X}$  structures.

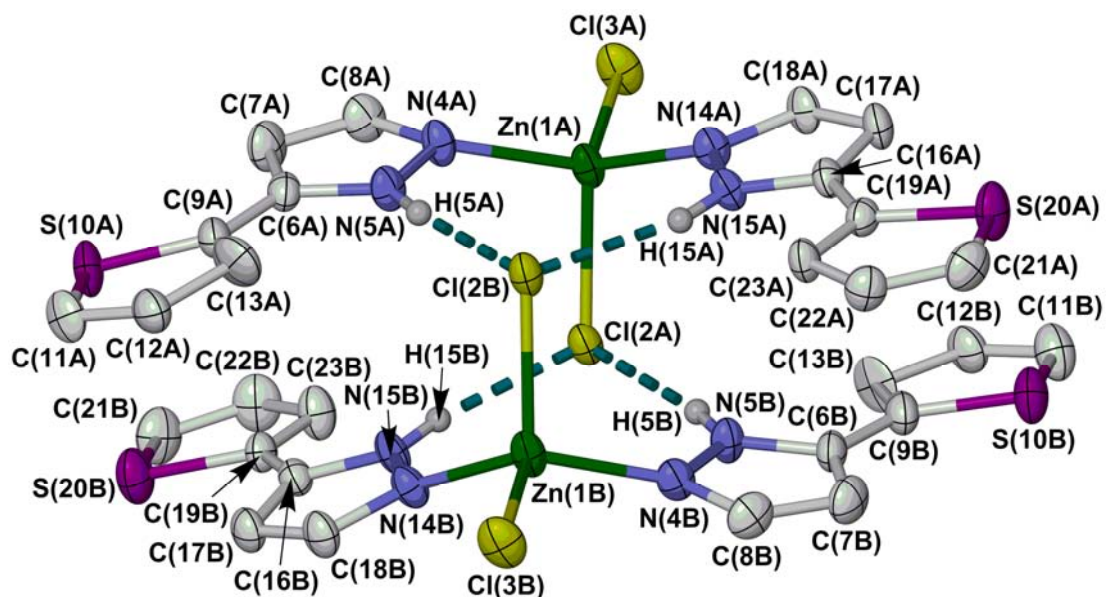

**Figure S1** View of the asymmetric unit in the crystal structure of  $[\text{ZnCl}_2(\text{Hpz}^{\text{Tn}})_2]$ . Only the major orientations of the disordered thienyl groups C(9A)-C(13A) and C(9B)-C(13B) are shown. All H atoms not involved in hydrogen bonding have been omitted for clarity, and displacement ellipsoids are at the 50% probability level. Colour code: C, white; H, grey; Cl, yellow; N, blue; S, purple; Zn, green.

**Table S1** Selected bond lengths and angles in the crystal structure of  $[\text{ZnCl}_2(\text{Hpz}^{\text{Tn}})_2]$  (Å, °).

|                      |            |                      |            |
|----------------------|------------|----------------------|------------|
| Zn(1A)-Cl(2A)        | 2.3506(11) | Zn(1B)-Cl(2B)        | 2.3469(11) |
| Zn(1A)-Cl(3A)        | 2.2322(11) | Zn(1B)-Cl(3B)        | 2.2279(12) |
| Zn(1A)-N(4A)         | 2.029(3)   | Zn(1B)-N(4B)         | 2.021(4)   |
| Zn(1A)-N(14A)        | 2.038(3)   | Zn(1B)-N(14B)        | 2.026(3)   |
| Cl(2A)-Zn(1A)-Cl(3A) | 117.68(4)  | Cl(2B)-Zn(1B)-Cl(3B) | 114.26(4)  |
| Cl(2A)-Zn(1A)-N(4A)  | 99.49(10)  | Cl(2B)-Zn(1B)-N(4B)  | 102.10(10) |
| Cl(2A)-Zn(1A)-N(14A) | 101.19(10) | Cl(2B)-Zn(1B)-N(14B) | 105.60(10) |
| Cl(3A)-Zn(1A)-N(4A)  | 107.33(10) | Cl(3B)-Zn(1B)-N(4B)  | 107.41(10) |
| Cl(3A)-Zn(1A)-N(14A) | 105.68(10) | Cl(3B)-Zn(1B)-N(14B) | 107.03(10) |
| N(4A)-Zn(1A)-N(14A)  | 126.25(13) | N(4B)-Zn(1B)-N(14B)  | 120.73(14) |

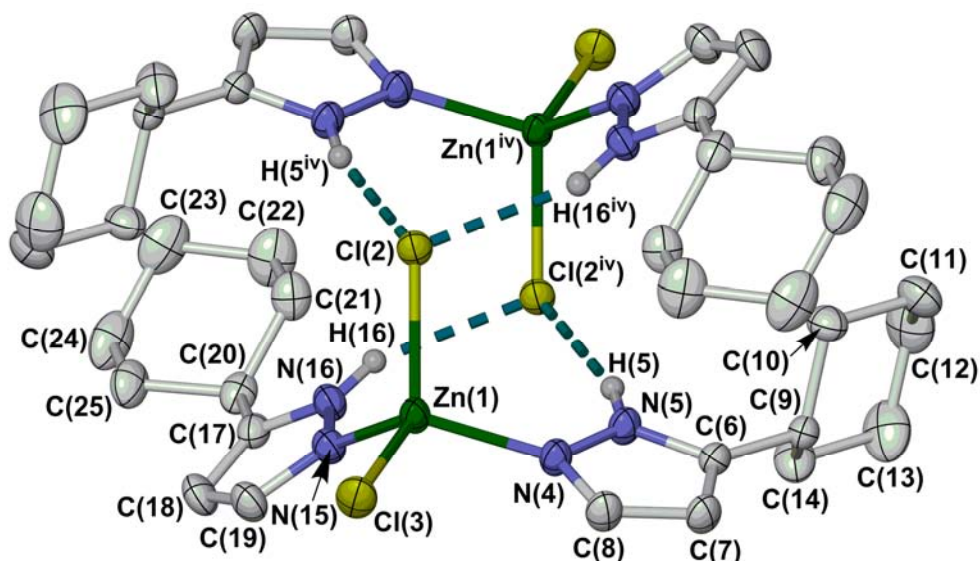

**Figure S2** View of the hydrogen-bonded dimer in the crystal structure of  $[\text{ZnCl}_2(\text{Hpz}^{\text{Cy}})_2]$ . All H atoms not involved in hydrogen bonding have been omitted for clarity, and displacement ellipsoids are at the 50% probability level. Symmetry code: (iv)  $-x, 1-y, 1-z$ . Colour code: C, white; H, grey; Cl, yellow; N, blue; Zn, green.

**Table S2** Selected bond lengths and angles in the crystal structure of  $[\text{ZnCl}_2(\text{Hpz}^{\text{Cy}})_2]$  ( $\text{\AA}$ ,  $^\circ$ ).

|                   |             |
|-------------------|-------------|
| Zn(1)–Cl(2)       | 2.3101(4)   |
| Zn(1)–Cl(3)       | 2.2469(4)   |
| Zn(1)–N(4)        | 2.0378(10)  |
| Zn(1)–N(15)       | 2.0334(10)  |
| Cl(2)–Zn(1)–Cl(3) | 116.141(14) |
| Cl(2)–Zn(1)–N(4)  | 106.89(3)   |
| Cl(2)–Zn(1)–N(15) | 105.64(3)   |
| Cl(3)–Zn(1)–N(4)  | 104.50(3)   |
| Cl(3)–Zn(1)–N(15) | 107.38(3)   |
| N(4)–Zn(1)–N(15)  | 116.75(4)   |

**Table S3** Metric parameters for hydrogen bonds in the  $[\text{ZnCl}_2(\text{Hpz}^{\text{R}})_2]$  structures (Å, °).  
 Symmetry codes: (i)  $1-x, 1-y, 1-z$ ; (ii)  $-x, -1/2+y, 3/2-z$ ; (iii)  $1-x, 1/2+y, 3/2-z$ ; (iv)  $-x, 1-y, 1-z$ ;  
 (v)  $-x-1/2, 1/2+y, 3/2-z$ .

|                                                                 | D–H (D = N, C) | H...Cl | D...Cl     | D–H...Cl |
|-----------------------------------------------------------------|----------------|--------|------------|----------|
| $[\text{ZnCl}_2(\text{Hpz}^{\text{Ph}})_2] \cdot \text{CHCl}_3$ |                |        |            |          |
| N(5)–H(5)...Cl(2 <sup>i</sup> )                                 | 0.88           | 2.42   | 3.2569(17) | 160.2    |
| N(16)–H(16)...Cl(2 <sup>i</sup> )                               | 0.88           | 2.48   | 3.3292(17) | 161.1    |
| C(26)–H(26)...Cl(3)                                             | 1.00           | 2.55   | 3.534(3)   | 167.8    |
| $[\text{ZnCl}_2(\text{Hpz}^{\text{Tn}})_2]$                     |                |        |            |          |
| N(5A)–H(5A)...Cl(2B)                                            | 0.88           | 2.34   | 3.216(3)   | 170.4    |
| N(15A)–H(15A)...Cl(2B)                                          | 0.88           | 2.37   | 3.230(4)   | 167.1    |
| N(5B)–H(5B)...Cl(2A)                                            | 0.88           | 2.38   | 3.247(3)   | 169.1    |
| N(15B)–H(15B)...Cl(2A)                                          | 0.88           | 2.37   | 3.240(3)   | 168.2    |
| C(7A)–H(7A)...Cl(3B <sup>ii</sup> )                             | 0.95           | 2.78   | 3.662(4)   | 155.1    |
| C(7B)–H(7B)...Cl(3A <sup>iii</sup> )                            | 0.95           | 2.75   | 3.684(4)   | 167.5    |
| $[\text{ZnCl}_2(\text{Hpz}^{\text{Cy}})_2]$                     |                |        |            |          |
| N(5)–H(5)...Cl(2 <sup>iv</sup> )                                | 0.88           | 2.32   | 3.1811(10) | 164.5    |
| N(16)–H(16)...Cl(2 <sup>iv</sup> )                              | 0.88           | 2.45   | 3.2755(11) | 156.4    |
| C(7)–H(7)...Cl(3 <sup>v</sup> )                                 | 0.95           | 2.80   | 3.6773(14) | 154.4    |

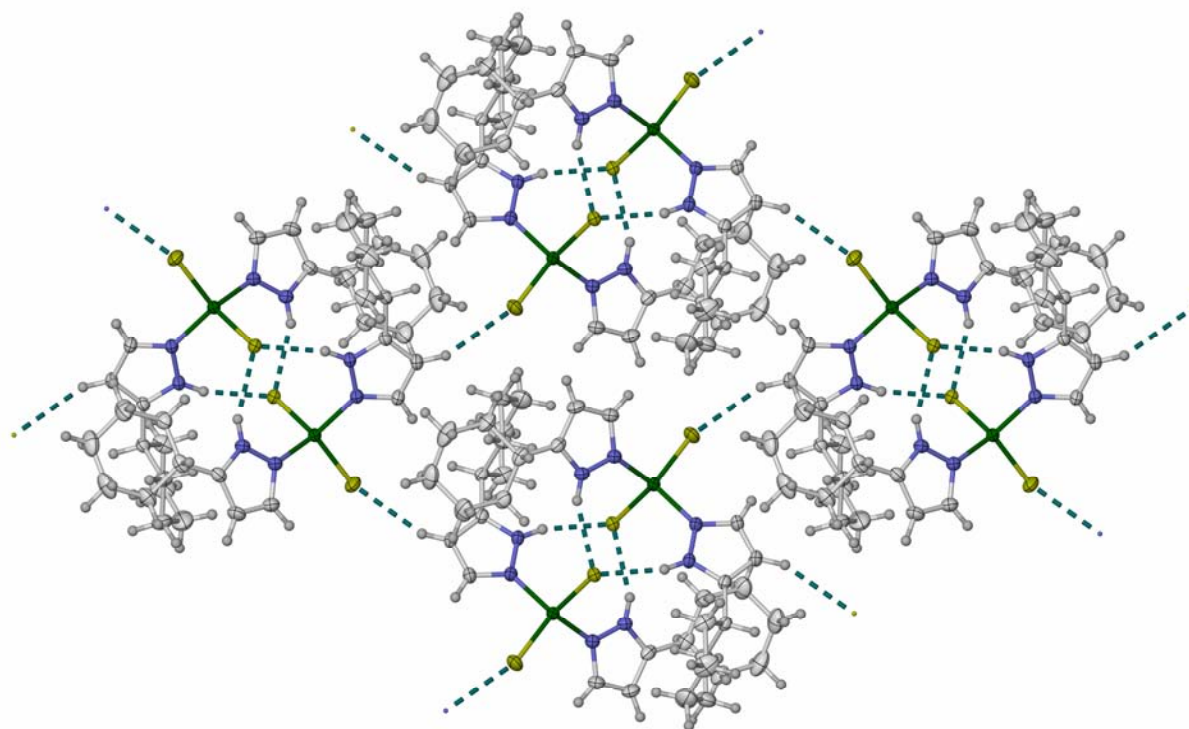

**Figure S3** Partial packing diagram of  $[\text{ZnCl}_2(\text{Hpz}^{\text{Cy}})_2]$ , showing the association of the dimers in the crystal through the C(7)–H(7)...Cl(3<sup>v</sup>) interaction (Table S3). The view is along the crystallographic (101) plane with *b* vertical, and displacement ellipsoids are at the 50% probability level. Colour code: C, white; H, grey; Cl, yellow; N, blue; Zn, green.

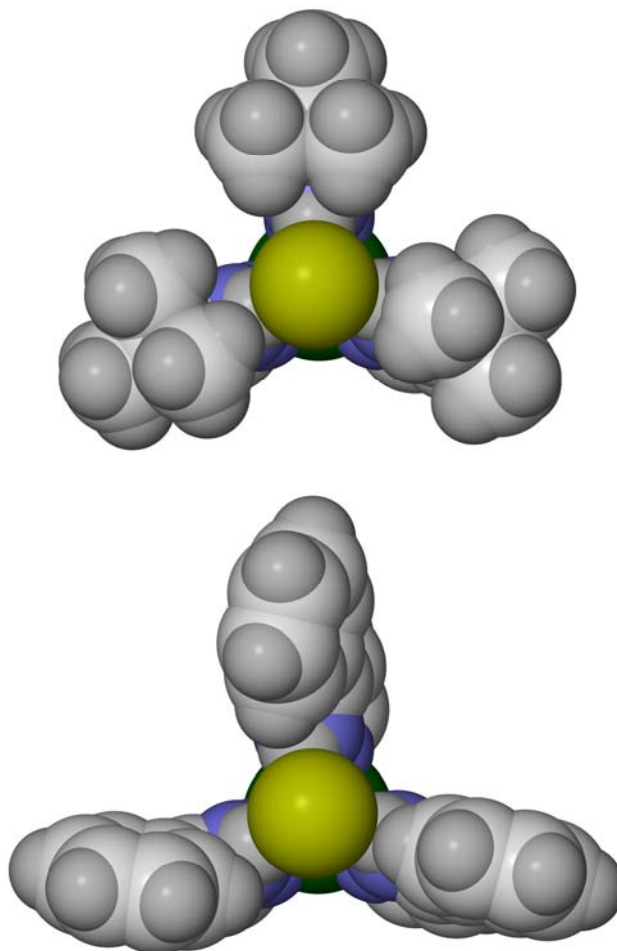

**Figure S4** Comparative space-filling views of the guest-binding cavities in  $[\text{ZnCl}(\text{Hpz}^{i\text{Bu}})_3]\text{Cl}$  (top) and  $[\text{ZnCl}(\text{Hpz}^{\text{Ph}})_3]\text{Cl}$  (bottom). The view in both cases is parallel to the Zn–Cl bond. Colour code: C, white; H, grey; Cl, yellow; N, blue; Zn, green.

Data for  $[\text{ZnCl}(\text{Hpz}^{i\text{Bu}})_3]\text{Cl}$  are taken from ref. 15 of the main paper.

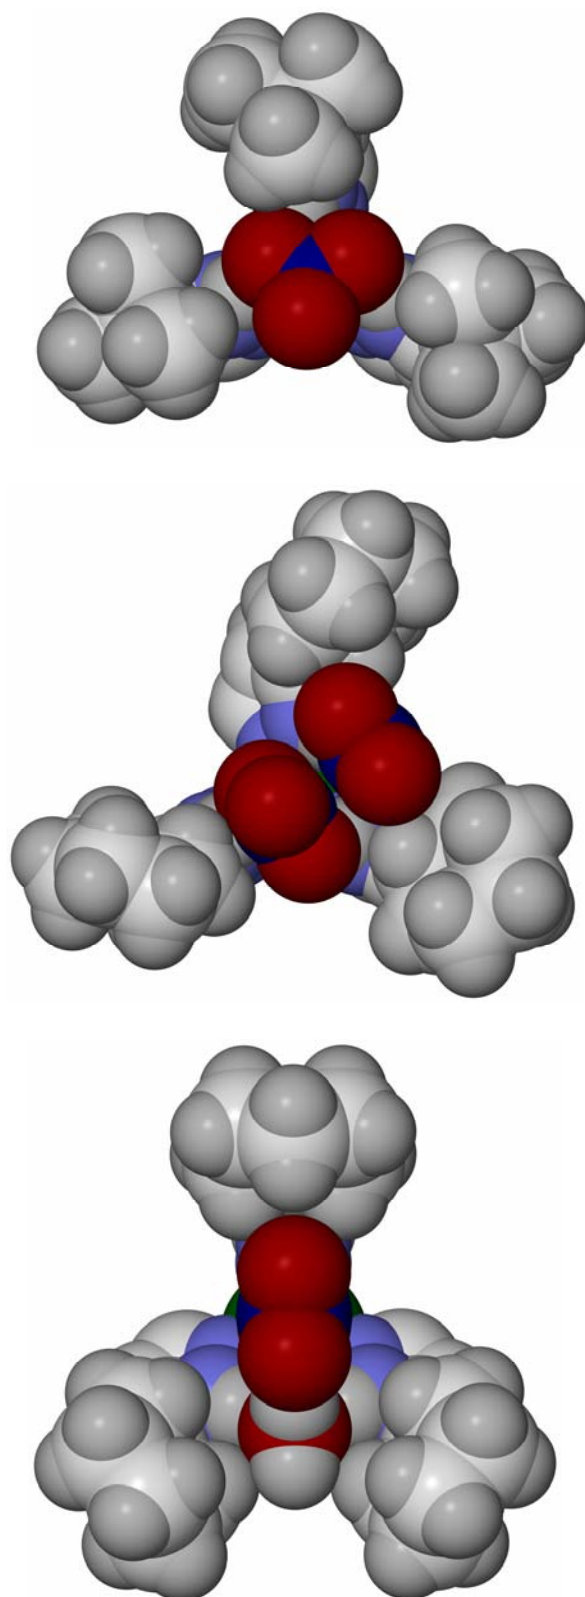

**Figure S5** Comparative space-filling views of the guest-binding cavities in  $[\text{ZnCl}(\text{Hpz}^{\text{tBu}})_3]\text{NO}_3$ , containing one nitrate guest (top); half the dimeric capsule in  $[\text{ZnCl}(\text{Hpz}^{\text{Cy}})_3]\text{NO}_3$ , containing two nitrate ions (middle); and the monomeric unit in  $[\text{ZnBr}(\text{Hpz}^{\text{Cy}})_3]\text{NO}_3 \cdot \text{H}_2\text{O}$ , containing a nitrate ion and water molecule (bottom). The views are parallel to the Zn-X ( $\text{X}^- = \text{Cl}^-$  or  $\text{Br}^-$ ) bond, and only one orientation of the disordered residues in the structures is shown. Colour code: C, white; H, grey; Cl or Br, yellow; N{pyrazole}, pale blue; N{nitrate}, dark blue; O, red; Zn, green.

Data for  $[\text{ZnCl}(\text{Hpz}^{\text{tBu}})_3]\text{NO}_3$  are taken from ref. 15 of the main paper.



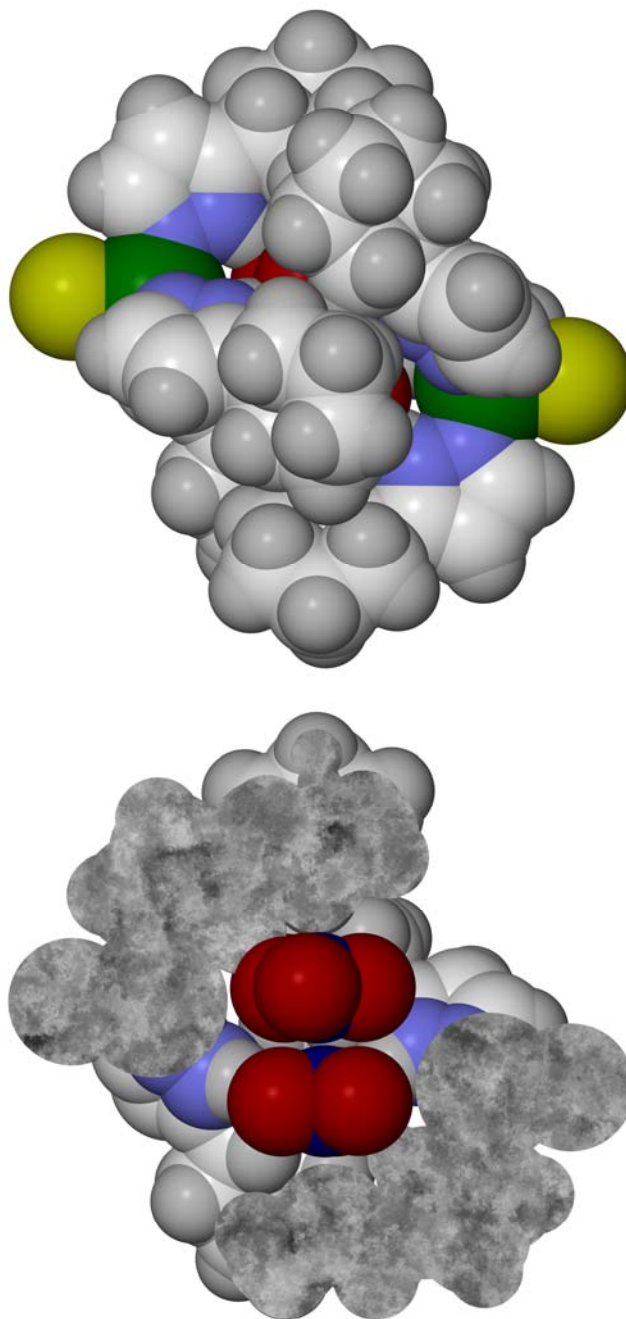

**Figure S6** Space-filling (top) and cutaway (bottom) diagrams of the hydrogen-bonded dimer in  $[\text{ZnCl}(\text{Hpz}^{\text{Cy}})_3]\text{NO}_3$ , showing the pair of nitrate ions encapsulated by two  $[\text{ZnCl}(\text{Hpz}^{\text{Cy}})_3]^+$  cations. Both views are the same as Fig. 3 of the main paper. Colour code: C, white; H, grey; Cl, yellow; N{pyrazole}, pale blue; N{nitrate}, dark blue; O, red; Zn, green.

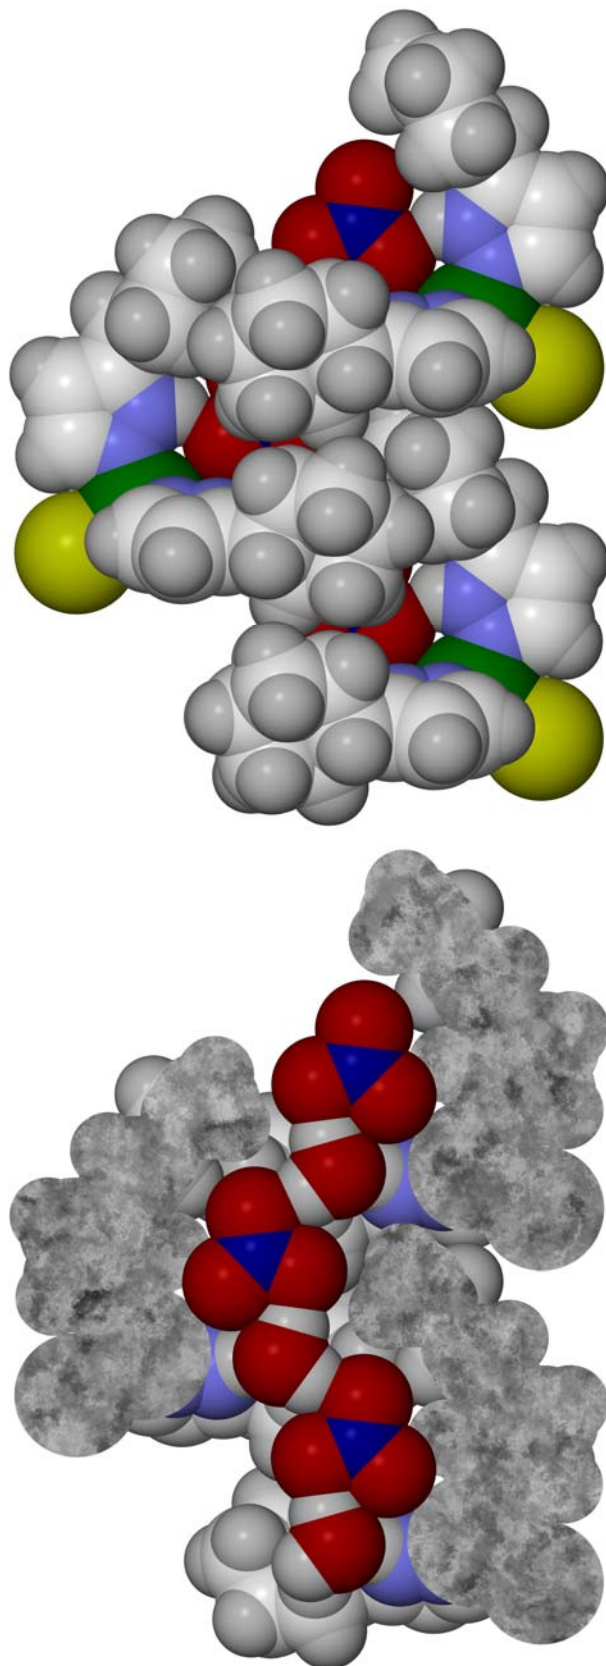

**Figure S7** Partial space-filling (top) and cutaway (bottom) packing diagrams of  $[\text{ZnBr}(\text{Hpz}^{\text{Cy}})_3]\text{NO}_3 \cdot \text{H}_2\text{O}$ , showing the  $[\text{NO}_3 \cdot \text{H}_2\text{O}]_n^-$  chains sheathed by the  $[\text{ZnBr}(\text{Hpz}^{\text{Cy}})_3]^+$  cations. Both views are the same as Fig. 5 of the main paper. Colour code: C, white; H, grey; Br, yellow; N{pyrazole}, pale blue; N{nitrate}, dark blue; O, red; Zn, green.



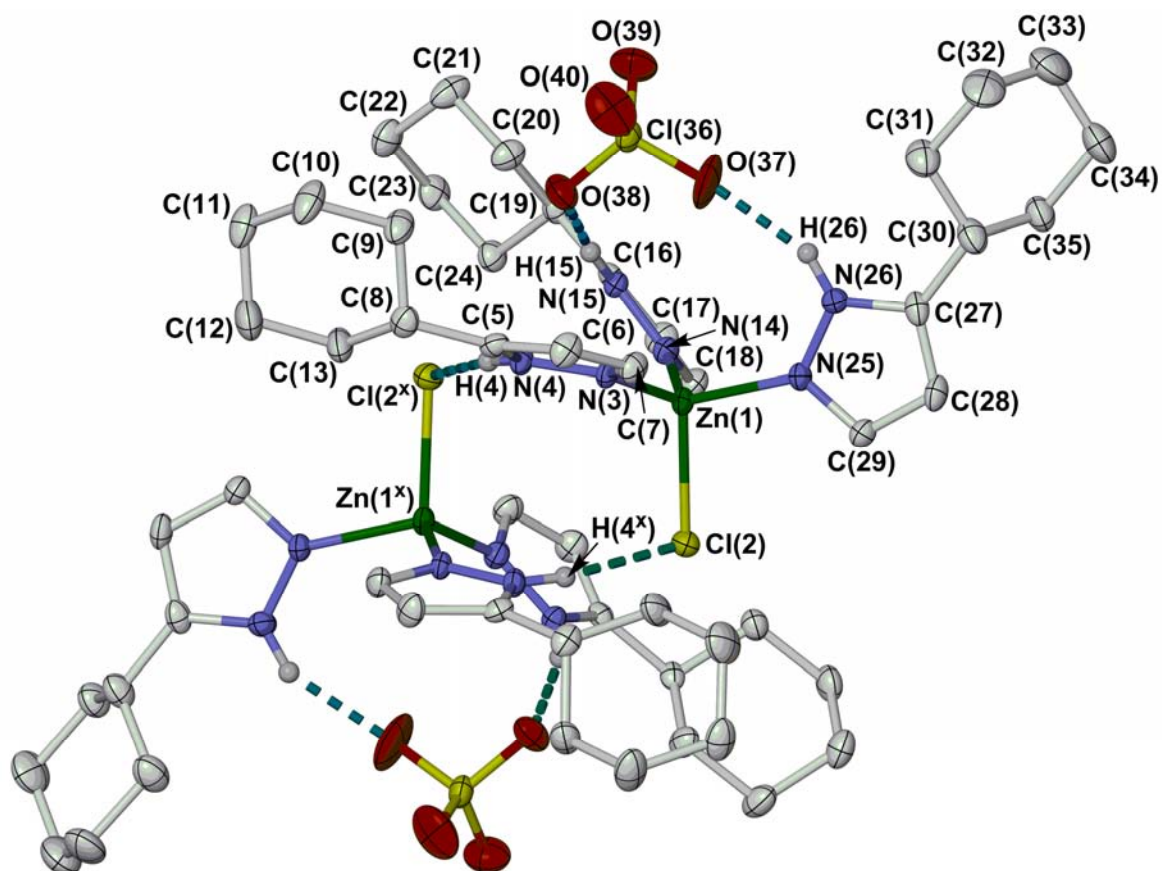

**Figure S8** View of the hydrogen-bonded dimer in the crystal structure of  $[\text{ZnCl}(\text{Hpz}^{\text{Cy}})_3]\text{ClO}_4$ . All H atoms not involved in hydrogen bonding have been omitted for clarity, and displacement ellipsoids are at the 50% probability level. Symmetry code: (x)  $-x, y, \frac{1}{2}-z$ . Colour code: C, white; H, grey; Cl, yellow; N, blue; O, red; Zn, green.

**Table S4** Selected bond lengths and angles in the crystal structure of  $[\text{ZnCl}(\text{Hpz}^{\text{Cy}})_3]\text{ClO}_4$  (Å, °).

|                   |           |
|-------------------|-----------|
| Zn(1)–Cl(2)       | 2.3075(9) |
| Zn(1)–N(3)        | 2.031(2)  |
| Zn(1)–N(14)       | 2.020(2)  |
| Zn(1)–N(25)       | 2.051(2)  |
| Cl(2)–Zn(1)–N(3)  | 111.12(6) |
| Cl(2)–Zn(1)–N(14) | 103.39(7) |
| Cl(2)–Zn(1)–N(25) | 103.61(6) |
| N(3)–Zn(1)–N(14)  | 122.78(8) |
| N(3)–Zn(1)–N(25)  | 102.60(9) |
| N(14)–Zn(1)–N(25) | 111.98(9) |

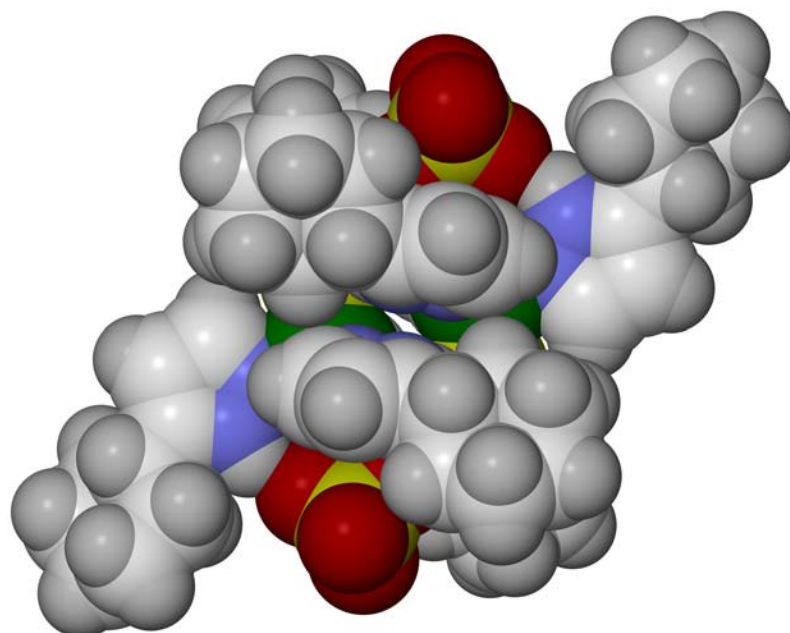

**Figure S9** Space-filling view of the hydrogen-bonded dimer in the crystal structure of  $[\text{ZnCl}(\text{Hpz}^{\text{Cy}})_3]\text{ClO}_4$ . The view is the same as in Fig. S6, and Fig. 6 of the main paper. Colour code: C, white; H, grey; Cl, yellow; N, blue; O, red; Zn, green.

**Table S5** Metric parameters for hydrogen bonds in the  $[\text{ZnY}(\text{Hpz}^{\text{R}})_3]\text{X}$  structures (Å, °). Symmetry codes: (vi)  $1-x, -y, -z$ ; (viii)  $1/2+x, 1/2-y, 3/2-z$ ; (x)  $-x, y, 1/2-z$ .

|                                                                                                 | D–H (D = N, O) | H...A (A = O, Cl) | D...A      | D–H...A |
|-------------------------------------------------------------------------------------------------|----------------|-------------------|------------|---------|
| <b><math>[\text{ZnCl}(\text{Hpz}^{\text{Ph}})_3]\text{Cl}</math></b>                            |                |                   |            |         |
| N(4)–H(4)...Cl(36)                                                                              | 0.88           | 2.37              | 3.2058(18) | 158.4   |
| N(15)–H(15)...Cl(36)                                                                            | 0.88           | 2.34              | 3.1428(16) | 152.2   |
| N(26)–H(26)...Cl(36)                                                                            | 0.88           | 2.29              | 3.1332(15) | 161.5   |
| <b><math>[\text{ZnCl}(\text{Hpz}^{\text{Cy}})_3]\text{NO}_3</math></b>                          |                |                   |            |         |
| N(4)–H(4)...O(37)                                                                               | 0.88           | 1.99              | 2.834(3)   | 160.7   |
| N(15)–H(15)...O(38)                                                                             | 0.88           | 1.97              | 2.813(3)   | 160.7   |
| N(26)–H(26)...O(39 <sup>A</sup> )                                                               | 0.88           | 2.04              | 2.913(3)   | 172.4   |
| <b><math>[\text{ZnBr}(\text{Hpz}^{\text{Cy}})_3]\text{NO}_3 \cdot \text{H}_2\text{O}</math></b> |                |                   |            |         |
| N(4)–H(4)...O(27)                                                                               | 0.88           | 2.01              | 2.874(3)   | 166.5   |
| N(15)–H(15)...O(24)                                                                             | 0.88           | 2.07              | 2.865(5)   | 149.4   |
| O(27)–H(27A)...O(25 <sup>viii</sup> ) <sup>a</sup>                                              | 0.99           | 2.55              | 3.321(4)   | 134.3   |
| O(27)–H(27A)...O(26 <sup>viii</sup> ) <sup>a</sup>                                              | 0.99           | 1.91              | 2.887(4)   | 169.2   |
| O(27)–H(27B)...O(24) <sup>a</sup>                                                               | 0.99           | 2.31              | 2.822(4)   | 111.2   |
| O(27)–H(27B)...O(25) <sup>a</sup>                                                               | 0.99           | 1.76              | 2.739(4)   | 171.2   |
| <b><math>[\text{ZnCl}(\text{Hpz}^{\text{Cy}})_3]\text{ClO}_4</math></b>                         |                |                   |            |         |
| N(4)–H(4)...Cl(2 <sup>x</sup> )                                                                 | 0.88           | 2.44              | 3.298(2)   | 165.3   |
| N(15)–H(15)...O(38)                                                                             | 0.88           | 2.08              | 2.919(3)   | 159.8   |
| N(26)–H(26)...O(37)                                                                             | 0.88           | 2.02              | 2.830(3)   | 152.9   |

<sup>a</sup>The long bonds O(27)–H(27A) and O(27)–H(27B) are an artefact of the refinement procedure, and metric parameters involving these H atoms should be treated with caution. See the main paper for more details.
